# Supplementary material
Source: PubMed Central journal article supplement (PMC6325193)
Supplement: 0ffce4222b3c7686e7983a5b2fa184d6_AAC.01817-18-s0001.pdf [file 0ffce4222b3c7686e7983a5b2fa184d6_AAC.01817-18-s0001.pdf]

# **Characterization of the first OXA-10 natural variant with significant carbapenemase activity**

**Stathis D. Kotsakis<sup>a,b</sup>, Carl-Fredrik Flach<sup>a,b</sup>, Mohammad Razavi<sup>a,b</sup>, D.G. Joakim Larsson<sup>a,b</sup>**

<sup>a</sup>Department of Infectious Diseases, Institute of Biomedicine, The Sahlgrenska Academy, University of Gothenburg, Gothenburg, Sweden

<sup>b</sup>Centre for Antibiotic Resistance Research (CARE) at University of Gothenburg, Gothenburg, Sweden

## **Supplemental material S1**

**Table S1. Primers used in this study**

| <b>Primer</b> | <b>Sequence (5'-3')</b>  | <b>Target; nts</b>  | <b>Reference</b>     |
|---------------|--------------------------|---------------------|----------------------|
| VIM-F         | GTTTGGTCGCATATCGCAAC     | blaVIM; 157-176     | Monteiro et al, 2012 |
| VIM-R         | AATGCGCAGCACCAGGATAG     | blaVIM; 538-519     | Monteiro et al, 2012 |
| NDM-F         | TTGGCCTTGCTGTCCTTG       | blaNDM; 647-630     | Monteiro et al, 2012 |
| NDM-R         | ACACCAGTGACAATATCACCG    | blaNDM; 566-586     | Monteiro et al, 2012 |
| IMP-F         | GAGTGGCTTAATTCTCRATC     | blaIMP; 313-332     | Monteiro et al, 2012 |
| IMP-R         | AACTARCCAATARYTAAC       | blaIMP; 415-432     | This study           |
| KPC-F         | TCGCTAAACTCGAACAGG       | blaKPC; 98-115      | Monteiro et al, 2012 |
| KPC-R         | TTACTGCCCGTTGACGCCCAATCC | blaKPC; 882-859     | Monteiro et al, 2012 |
| GES-F         | CTATTACTGGCAGGGATCG      | blaGES; 19-37       | Monteiro et al, 2012 |
| GES-R         | CCTCTCAATGGTGTGGGT       | blaGES; 612-595     | Monteiro et al, 2012 |
| OXA-10-F      | CAGTAAATCCTGCGCTAC       | blaOXA-10; 141-158  | This study           |
| OXA-10-R      | GGCGAAAAAGTAAACCTC       | blaOXA-10; 708-691  | This study           |
| M-SHV-F       | AGCCGCTTGAGCAAATTAAC     | blaSHV; 71-91       | Dallene et al, 2010  |
| M-SHV-R       | ATCCCGCAGATAAATCACCCAC   | blaSHV; 783-763     | Dallene et al, 2010  |
| TEM-A         | GAGTATTCAACATTTCCGTGTC   | blaTEM; 3-24        | Drieux et al, 2009   |
| TEM-B         | TAATCAGTGAGGCACCTATCTC   | blaTEM; 850-829     | Drieux et al, 2009   |
| M-OXA-1-F     | GGCACCAGATTCAACTTTCAAG   | blaOXA-1; 201-222   | Dallene et al, 2010  |
| M-OXA-1-R     | GACCCCAAGTTTCCTGTAAGTG   | blaOXA-1; 764-743   | Dallene et al, 2010  |
| repB_pEA3-F   | GATGAGTTGGGCGCAGGG       | pEA3; 1216-1199     | This study           |
| repB_pEA3-R   | GTCGCCCCGGACAACAGC       | pEA3; 617-634       | This study           |
| mobC-F        | GCAGCAAGAGCGCAAGAAC      | pQGU13; 184-166     | This study           |
| tnpA-Tn3x-F   | CAGTACCAAGGTCGGCGC       | pQGU13; 13415-13432 | This study           |
| tnpR-Tn3x-F   | GCGATTTGTGTGTGGAAC       | pQGU13; 9850-9833   | This study           |
| Int11F        | CGTTCCATACAGAAGCTG       | pQGU13; 8909-8892   | This study           |
| IS4321-F      | CTGTGTAGGAAAAGCAACT      | pQGU13; 14454-14472 | This study           |
| IS4321-R      | AGAAGGGTACTCAGTCGGC      | pQGU13; 14044-14026 | This study           |

**Table S2. Acquired non-beta-lactam resistance determinants detected in WGS data of *E. cloacae* WW13 and *E. coli* WW16.**

| <b>Antibiotic class</b> | <i>E. cloacae</i> WW13 | <i>E. coli</i> WW16                                 |
|-------------------------|------------------------|-----------------------------------------------------|
| Aminoglycosides         | <i>strA</i>            | <i>strA, aac(3)-IIa, aadA1, aacA4, aac(6')Ib-cr</i> |
| Sulfonamides            | <i>sul2</i>            | <i>sul1, sul2</i>                                   |
| Fluoroquinolones        | none                   | <i>aac(6')Ib-cr</i>                                 |
| Tetracyclines           | none                   | none                                                |
| Phenicol                | none                   | <i>catA2, catB2, catB3</i>                          |
| Trimethoprim            | <i>none</i>            | <i>dfrA12</i>                                       |

**Table S3. Replicase genes and replicons detected by PlasmidFinder in contigs of *E. cloacae* WW13 and *E. coli* WW16.**

| Rep.                          | % ID  | Query/HSP length | Contig   | Acc. number |
|-------------------------------|-------|------------------|----------|-------------|
| <b><i>E. cloacae</i> WW13</b> |       |                  |          |             |
| IncFII                        | 84.85 | 264 / 258        | NODE_16  | AF401292    |
| IncQ1                         | 100   | 450 / 450        | NODE_32  | HE654726    |
| ColRNAI                       | 88.3  | 94 / 130         | NODE_63  | DQ298019    |
| ColRNAI                       | 89.36 | 94 / 130         | NODE_54  | DQ298019    |
| ColRNAI                       | 89.36 | 94 / 130         | NODE_61  | DQ298019    |
| IncFIB(K)                     | 98.75 | 560 / 560        | NODE_34  | JN233704    |
| IncFII(Y)                     | 87.95 | 224 / 227        | NODE_25  | CP001049    |
| IncFIB(pECLA)                 | 100   | 560 / 560        | NODE_31  | CP001919    |
| ColRNAI                       | 91.49 | 94 / 130         | NODE_38  | DQ298019    |
| IncFIA(HI1)                   | 98.97 | 387 / 388        | NODE_55  | AF250878    |
| <b><i>E. coli</i> WW16</b>    |       |                  |          |             |
| IncHI1B(R27)                  | 100   | 540/540          | NODE_52  | AF250878    |
| IncFIA(HI1)                   | 98.45 | 387/388          | NODE_116 | AF250878    |
| IncHI1A                       | 99.76 | 420/420          | NODE_52  | AF250878    |
| IncFII(K)                     | 98.65 | 148/148          | NODE_29  | CP000648    |
| ColRNAI                       | 86.17 | 94/130           | NODE_96  | DQ298019    |
| IncQ1                         | 100   | 450/450          | NODE_68  | HE654726    |

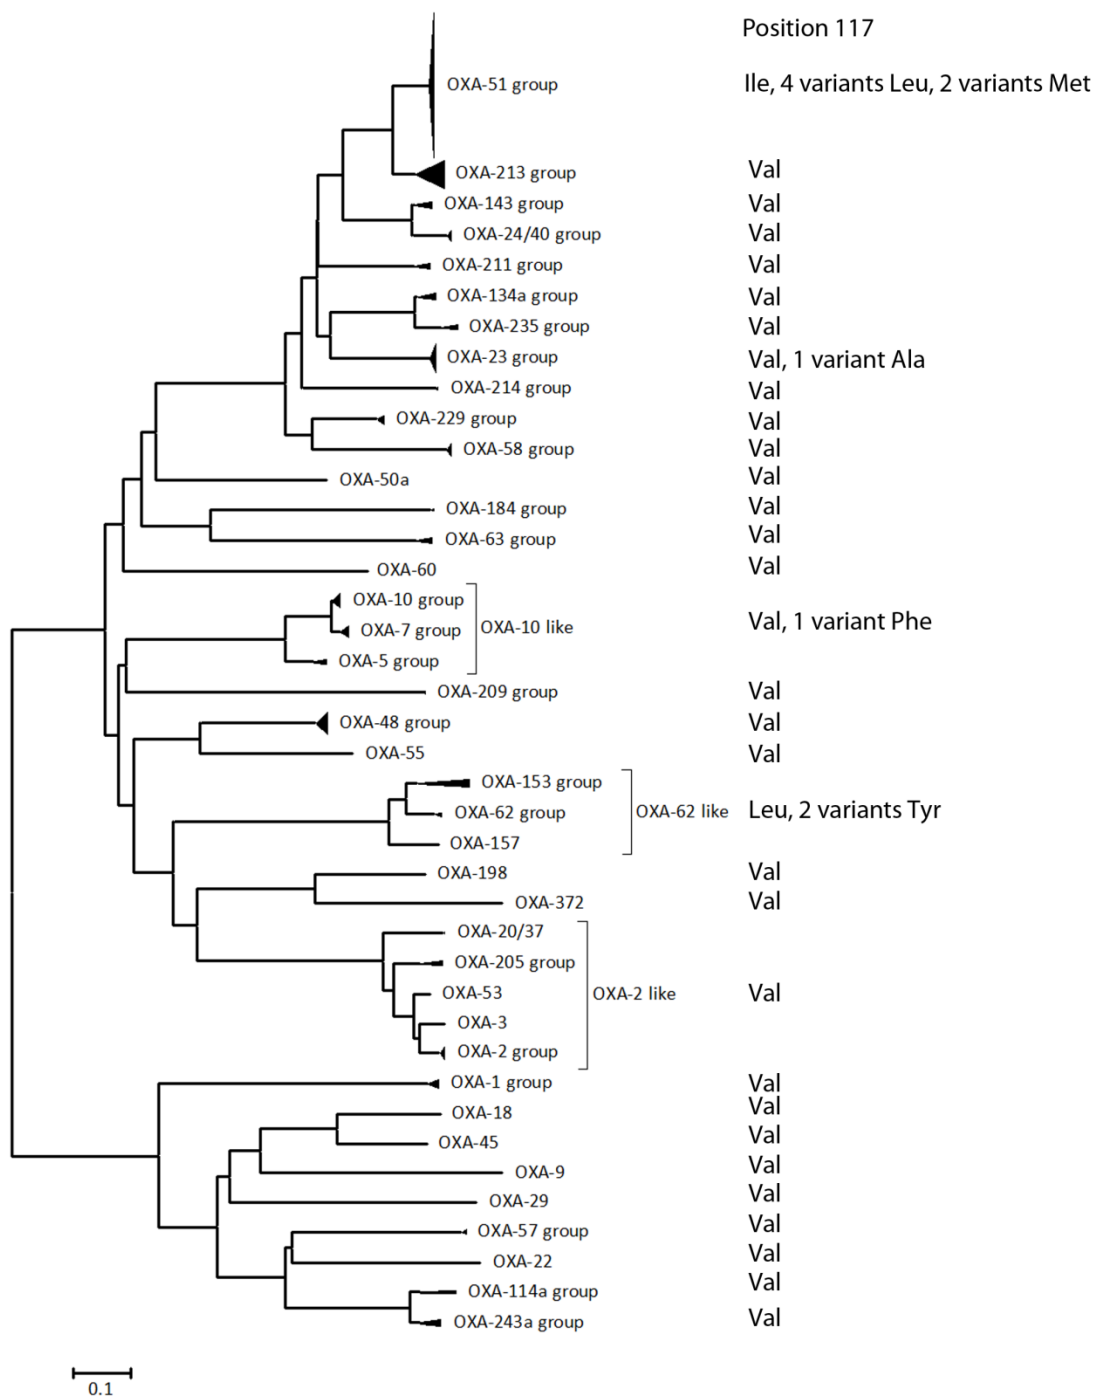

**Figure S1. Primary structure relationships among OXA  $\beta$ -lactamases and residue at position 117.**

The tree was constructed by the Neighbor-Joining method using available amino-acids sequences (n=320) of the so far published OXA enzymes in the Lahey Clinic Bla database (<https://www.lahey.org/Studies/>). The optimal tree with the sum of branch length = 13.15838779 is shown. The tree is drawn to scale, with branch lengths in the same units as those of the evolutionary distances used to infer the phylogenetic tree. The evolutionary distances were computed using the Poisson correction method and are in the units of the number of amino acid substitutions per site. All positions containing gaps and missing data were eliminated. Evolutionary analyses were conducted in MEGA7. Amino acids occupying position 117 in the various OXA groups are indicated in the right column as well as the substitutions that have been observed in natural variants.

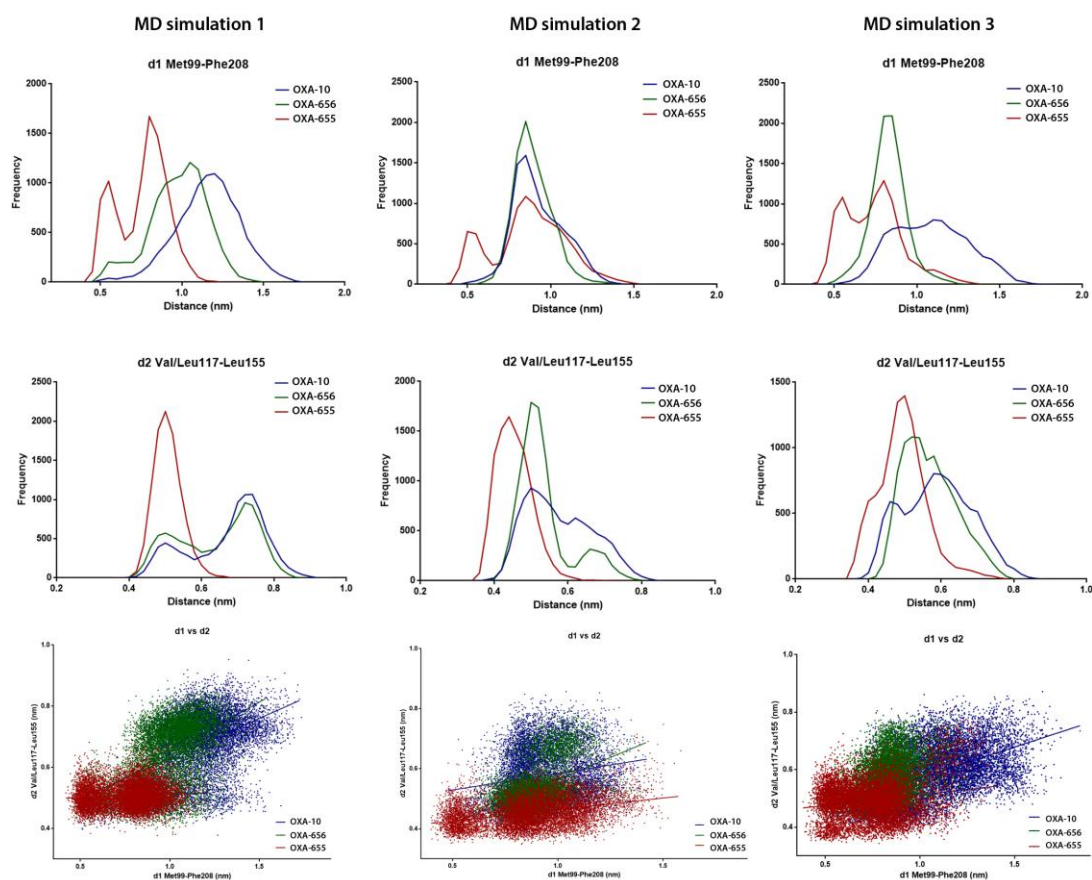

**Figure S2. Structural differences between OXA-10, OXA-655 and OXA-656 observed during 3 separate 10 ns MD simulations.**

Distribution of distances between the C $\epsilon$  atom of Met99 side chain and the center of mass of Phe208 ring carbon atoms ( $d_1$ ; upper plots) and between the methyl groups of Val/Leu117 and Leu155 ( $d_2$ ; medium plots). Frequency denotes actual number of structures. The relation of  $d_1$  and  $d_2$  is depicted in the lower plots.

## References

- Monteiro J, Widen RH, Pignatari AC, Kubasek C, Silbert S. Rapid detection of carbapenemase genes by multiplex real-time PCR. *J Antimicrob Chemother.* 2012;67:906-9
- Dallenne C, Da Costa A, Decré D, Favier C, Arlet G. Development of a set of multiplex PCR assays for the detection of genes encoding important beta-lactamases in Enterobacteriaceae. 2010;65(3):490-5
- Drieux L, Brossier F, Duquesnoy O, Aubry A, Robert J, Sougakoff W, et al. Increase in hospital-acquired bloodstream infections caused by extended spectrum beta-lactamase-producing *Escherichia coli* in a large French teaching hospital. *Eur. J. Clin. Microbiol. Infect. Dis.* 2009;28:491-498
